# Supplementary material for: Distribution and Characteristics of Ocular Biometric Parameters among a Chinese Population: A Hospital-Based Study
Source: Springer Nature journal article supplement (doi:10.1007/s40123-023-00716-x), 2023-05-26
Supplement: MOESM1 [file 25410488]

# Distribution and Characteristics of Ocular Biometric Parameters among Chinese Population: A Hospital-Based Study

Xiaohang Chen<sup>1,2,3</sup>, Yongzhi Huang<sup>1</sup>, Hao Chen<sup>1</sup>, Longqian Liu<sup>1,2,3\*</sup>

<sup>1</sup> Department of Ophthalmology, West China Hospital, Sichuan University, Chengdu, Sichuan, China

<sup>2</sup> Laboratory of Optometry and Vision Sciences, West China Hospital, Sichuan University, Chengdu, Sichuan, China

<sup>3</sup> Department of Optometry and Visual Science, West China Hospital, Sichuan University, Chengdu, Sichuan, China

\*Corresponding author:

Longqian Liu

Email: [b.q15651@hotmail.com](mailto:b.q15651@hotmail.com)

**Supplementary Table 1.** Mean ocular biometric parameters reported by previous studies.

| Study                       | Location | Year of Publication | Design                                                | Age   | Sample Size (subjects) | Measurement Method                                         | AL    | K     | ACD  | KA   |
|-----------------------------|----------|---------------------|-------------------------------------------------------|-------|------------------------|------------------------------------------------------------|-------|-------|------|------|
| Chen et al. (present study) | China    | 2023                | Hospital-based study                                  | 3–114 | 85770                  | IOL Master                                                 | 24.61 | 43.76 | 3.30 | 1.19 |
| Frisch et al.               | Germany  | 2007                | Cohort study with normal subjects and phakic patients | 16–87 | 145                    | IOL Master                                                 | 24.04 | -     | 3.36 | -    |
| Orucoglu et al.             | Turkey   | 2015                | Clinic-based study                                    | 3–85  | 666                    | Pentacam                                                   | -     | 43.20 | 3.03 | 1.22 |
| Popov et al.                | Slovakia | 2021                | Hospital-based study                                  | 19–96 | 2340                   | Lenstar LS900                                              | 23.33 | 44.03 | 3.08 | 0.91 |
| AlMahmoud et al.            | Canada   | 2011                | Hospital-based study                                  | 19–84 | 1858                   | Ultrasound pachymetry, Pentacam, autorefractor keratometer | -     | 43.95 | -    | 1.05 |

|                    |             |      |                        |       |      |                   |       |       |      |      |
|--------------------|-------------|------|------------------------|-------|------|-------------------|-------|-------|------|------|
| Hashemi et al.     | Iran        | 2021 | Population-based study | 6–90  | 2672 | Pentacam          | -     | 43.48 | -    | 1.01 |
| Hashemi et al.     | Iran        | 2009 | Population-based study | 14–81 | 399  | Orbiscan II       | -     | -     | 2.79 | -    |
| Park et al.        | South Korea | 2010 | Hospital-based study   | 29–95 | 291  | IOL Master        | 24.35 | 43.48 | 3.58 | -    |
| Ferreira et al.    | Portugal    | 2017 | Hospital-based study   | 44–99 | 6506 | Lenstar<br>LS900  | 23.87 | 43.91 | 3.25 | 1.08 |
| KhabazKhoob et al. | Iran        | 2010 | Population-based study | 14–81 | 399  | Orbiscan II       | -     | 44.39 | -    | 0.98 |
| Shufelt et al.     | USA         | 2005 | Population-based study | >40   | 5588 | A-Scan pachymeter | 23.38 | 43.72 | 3.41 | -    |

---
